# Supplementary material
Source: Research Square preprint supplement (doi:10.21203/rs.3.rs-10405171/v1)
Supplement: Supplementary file 1 [file 11caba00947566117a0904a0.docx]

## SMART - Additional File 5

## Data availability/exclusion

**Tidal Volume @ PCV:**

A total of 40 measurements were theoretically possible (10 patients × 4 PEEP levels). In Patient 5, the first low-flow maneuver at PEEPinit was aborted. Therefore, three measurements are missing, resulting in 37 data sets.

**Driving Pressure @ VCV:**

A VCV period was available only at two PEEP levels (PEEPinit and PEEPEIT). Although short VCV segments also appeared at PEEPmin and maxPEEPmax, these occurred only in the context of hold maneuvers and maneuvers halving the driving pressure and did not contain stable periods of regular breaths. Thus, a maximum of 20 measurements was possible (10 patients × 2 PEEP levels). Measurements for Patient 5 are missing at both levels (see above), resulting in 18 data sets.

**Transpulmonary Pressure @ PCV:**

A total of 40 measurements were theoretically possible (10 patients × 4 PEEP levels). As above, Patient 5 had data only at PEEPinit. In addition, Patient 4 was excluded due to highly unstable esophageal pressure signals. Thus, 3 measurements (Patient 5) plus all 4 PEEP levels for Patient 4 were excluded, resulting in 33 data sets.

**EIT (combined PCV and VCV plots):**

In total, 60 measurements were theoretically possible (40 PCV + 20 VCV), 6 for every patient. As mentioned above, measurements for Patient 5 were incomplete (only at PEEPinit) resulting in one datasets for Patient 5. No data was available for Patient 3, 4 and 6 due to unusable or missing EIT data (Patient 3: belt not worn/data lost; Patient 4 and 6: EIT data markedly affected by noise due to belt shift). These three patients were therefore excluded entirely. This results in 37 data sets (60 − 5 missing measurements for Patient 5 − 18 measurements for the three excluded patients).
