# Supplementary material
Source: Research Square preprint supplement (doi:10.21203/rs.3.rs-10405171/v1)
Supplement: Supplementary file 5 [file a0241f895e8e97c8f814b885.docx]

## SMART - Additional File 7


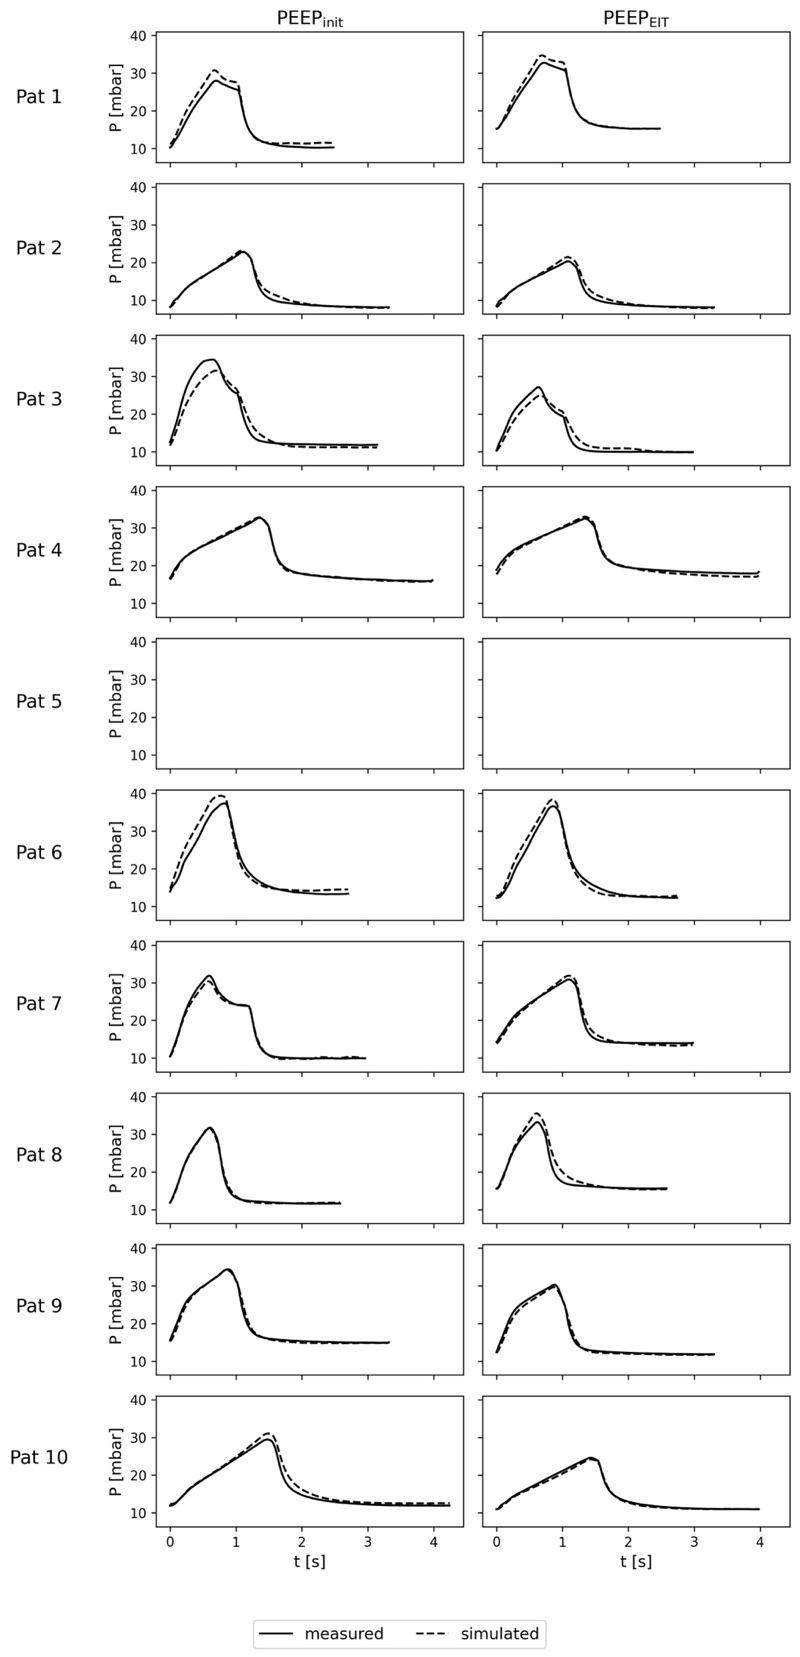
Comparison of Measured and Simulated Airway Pressure and Tidal Volume

**Figure 1** Comparison of measured and simulated airway pressure curves at PEEPinit and PEEPEIT across all patients.


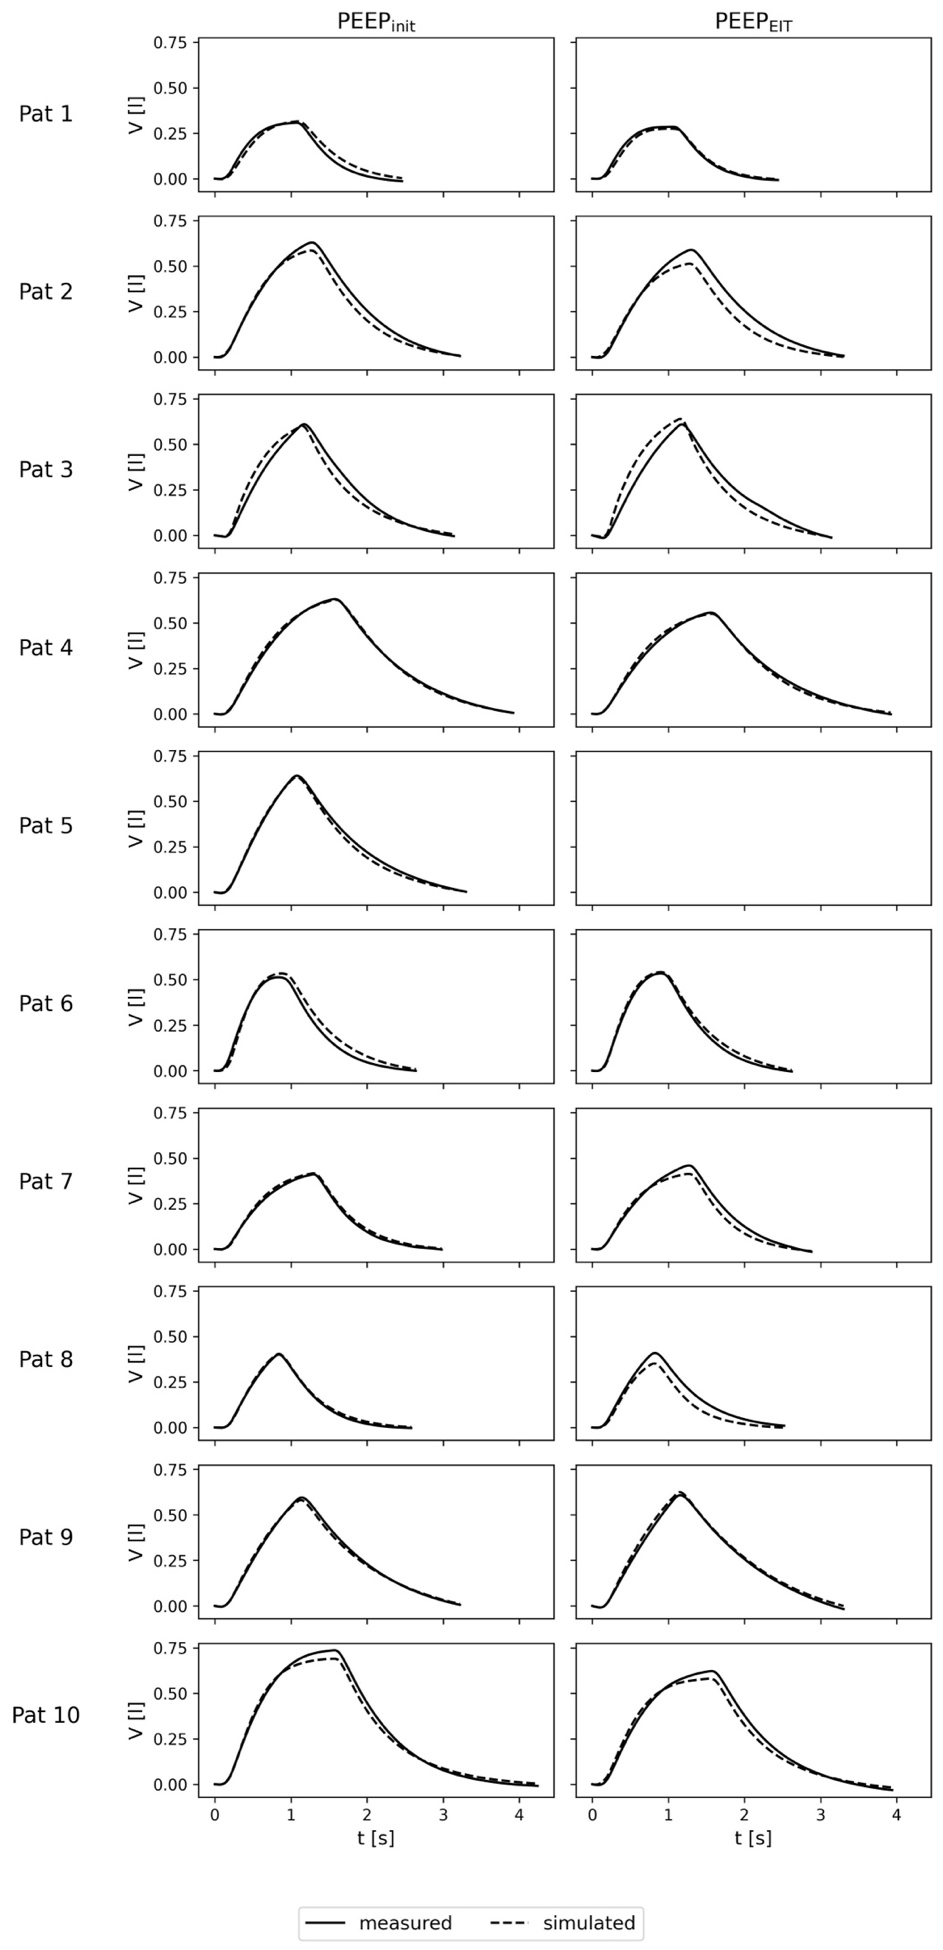


**Figure 2** Comparison of measured and simulated tidal volume curves at PEEPinit and PEEPEIT across all patients.
