# Supplementary material
Source: Research Square preprint supplement (doi:10.21203/rs.3.rs-10405171/v1)
Supplement: Supplementary file 7 [file b80bf2af0f2246941ce04942.docx]

## SMART - Additional File 1


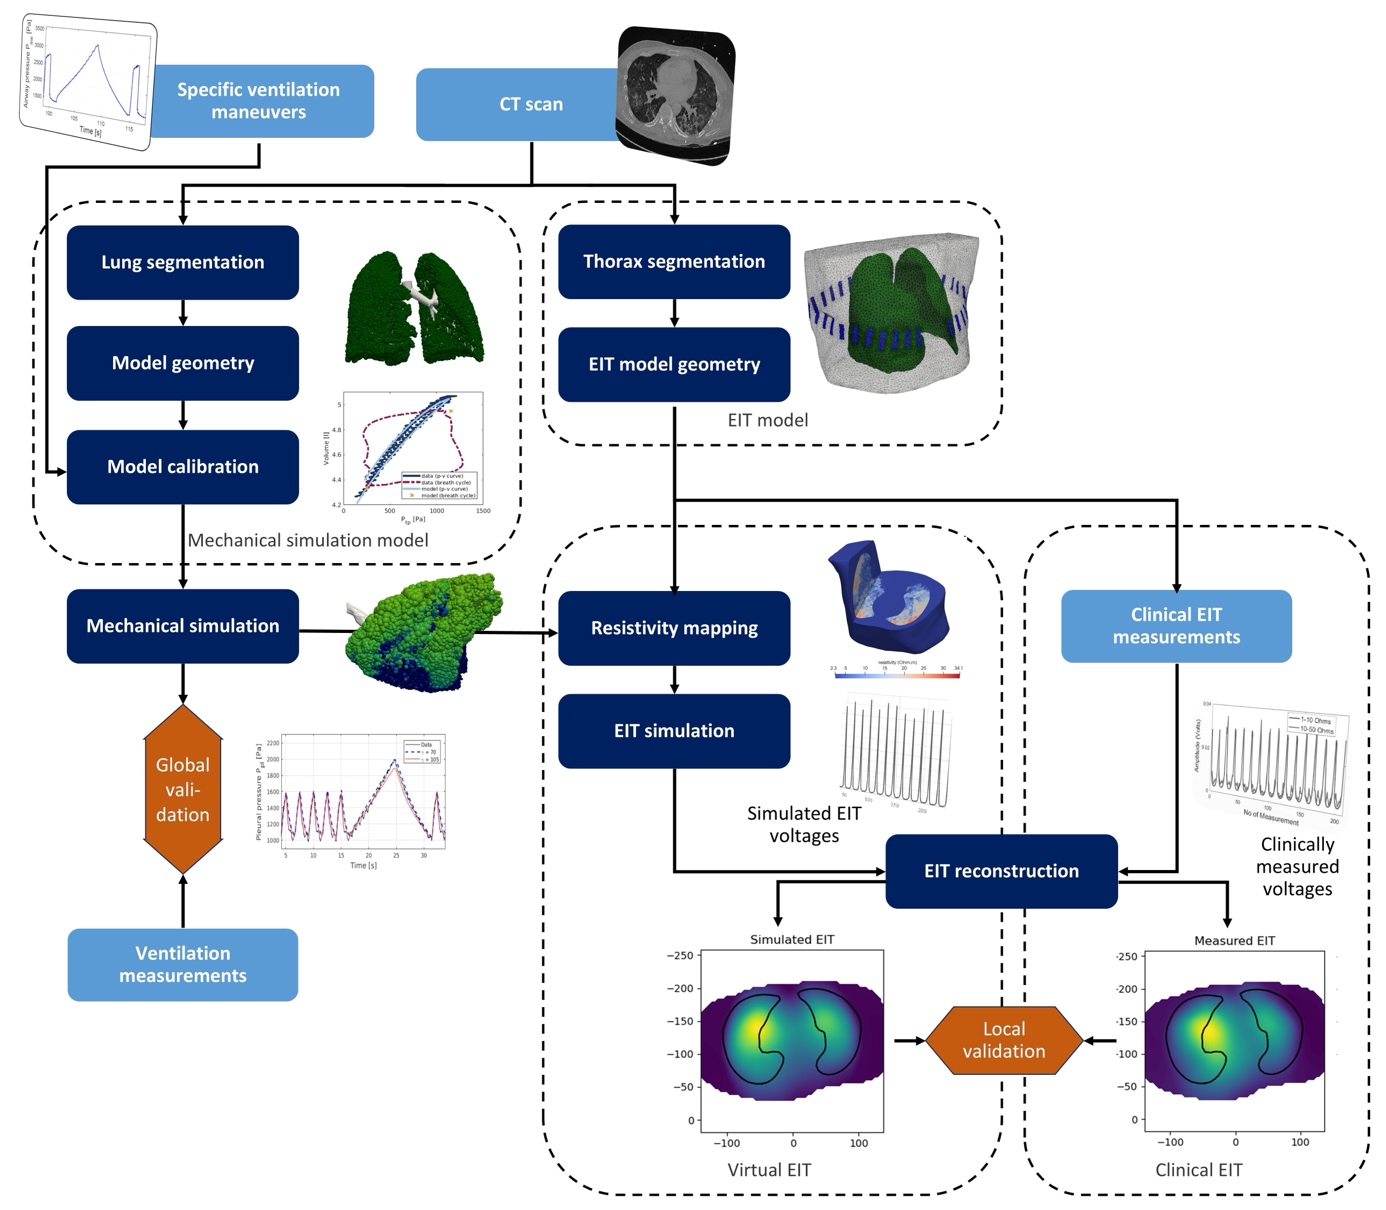


**Figure 1** Workflow of the computational modeling process. highlighting the point of use of clinical data (light blue), procedural steps (dark blue), and their sequence (arrows).
