# Supplementary material
Source: Research Square preprint supplement (doi:10.21203/rs.3.rs-10405171/v1)
Supplement: Supplementary file 8 [file c55642ee68c8ff4c9b950aaf.docx]

## SMART - Additional File 3

## **Figure 1** Assessment of Ventilation Distribution by Electrical Impedance Tomography


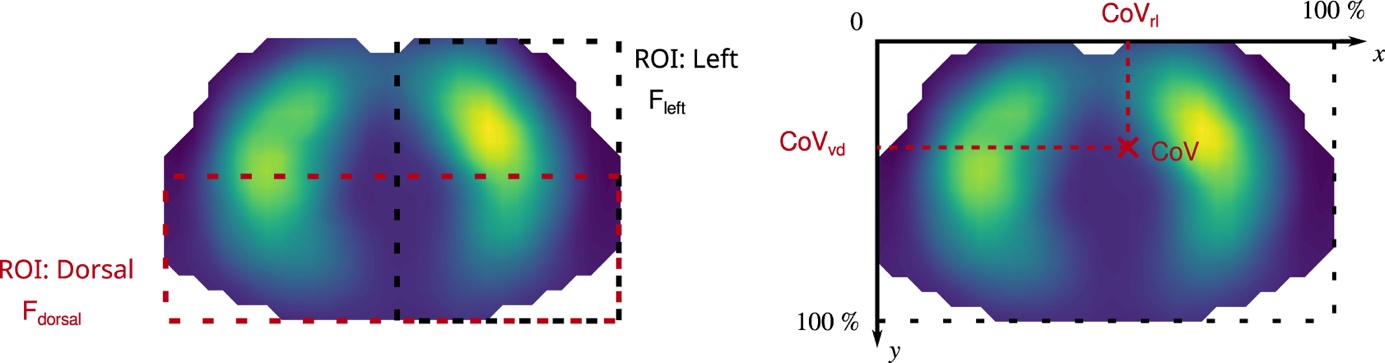


Assessment of ventilation distribution with EIT, using the fraction of ventilation in the dorsal and left region-of-interest (ROI) and by the geometrical center of ventilation (CoV). ROI fractions of the left and dorsal halves are referred to as Fdorsal and Fleft, respectively. For the CoV, two components were distinguished, namely the CoVrl along the right-to-left axis and the CoVvd along the ventral-to-dorsal axis. Values over represent a ventilation that is shifted in the left and dorsal direction. Note that classical medical image conventions are used, where the left lung is on the right side of a transverse section.
